# Supplementary material
Source: PubMed Central journal article supplement (PMC6109597)
Supplement: NIHMS969415-supplement-1.pdf [file NIHMS969415-supplement-1.pdf]

**Table S1. Baseline characteristics of participants who initiated dialysis who were included versus excluded in the analysis.**

| Variable                                                                           | Exclude<br>(n=465) <sup>1</sup> | Include<br>(n=417) <sup>2</sup> | P<br>value <sup>3</sup> |
|------------------------------------------------------------------------------------|---------------------------------|---------------------------------|-------------------------|
| Age, year, mean±SD                                                                 | 57.08±12.04                     | 55.56±11.00                     | 0.05                    |
| Men, N(%)                                                                          | 281 (60.43%)                    | 245 (58.75%)                    | 0.6                     |
| Race, N(%)                                                                         |                                 |                                 |                         |
| Non-Hispanic white                                                                 | 122 (26.24%)                    | 82 (19.66%)                     | 0.1                     |
| Non-Hispanic black                                                                 | 241 (51.83%)                    | 234 (56.12%)                    | .                       |
| Hispanic                                                                           | 84 (18.06%)                     | 85 (20.38%)                     | .                       |
| Other                                                                              | 18 (3.87%)                      | 16 (3.84%)                      | .                       |
| Current smoker, N(%)                                                               | 87 (18.71%)                     | 65 (15.59%)                     | 0.2                     |
| Estimated glomerular filtration rate,<br>ml/min/1.73m <sup>2</sup> , mean±SD       | 32.53±11.33                     | 32.05±10.28                     | 0.5                     |
| BMI, kg/m <sup>2</sup> , mean±SD                                                   | 32.45±8.19                      | 33.07±8.24                      | 0.3                     |
| Systolic blood pressure, mmHg, mean±SD                                             | 139.81±24.45                    | 139.64±23.34                    | 0.9                     |
| Diastolic blood pressure, mmHg, mean±SD                                            | 73.73±14.47                     | 75.03±13.69                     | 0.2                     |
| LDL, mg/dl, mean±SD                                                                | 105.37±42.53                    | 103.38±39.92                    | 0.5                     |
| HDL, mg/dl, mean±SD                                                                | 45.60±15.47                     | 45.83±14.51                     | 0.8                     |
| Triglycerides, mg/dl, median (IQR)                                                 | 140.00 (99.00-<br>208.00)       | 149.00 (98.50-<br>208.00)       | 0.6                     |
| Total cholesterol, mg/dl, mean±SD                                                  | 190.19±59.13                    | 188.10±51.74                    | 0.6                     |
| Hemoglobin, g/dl, mean±SD                                                          | 11.87±1.79                      | 11.79±1.82                      | 0.5                     |
| HbA1c hemoglobin, %, mean±SD                                                       | 7.30±1.94                       | 7.08±1.75                       | 0.08                    |
| Serum albumin, g/dl, mean±SD                                                       | 3.66±0.54                       | 3.64±0.53                       | 0.6                     |
| Hypertension, N(%)                                                                 | 435 (93.55%)                    | 402 (96.40%)                    | 0.05                    |
| Cardiovascular disease, N(%)                                                       | 199 (42.80%)                    | 161 (38.61%)                    | 0.2                     |
| Chronic obstructive pulmonary disease, N(%)                                        | 17 (3.73%)                      | 11 (2.68%)                      | 0.4                     |
| Diabetes, N(%)                                                                     | 312 (67.10%)                    | 283 (67.87%)                    | 0.8                     |
| β-blockers, N(%)                                                                   | 301 (65.43%)                    | 230 (55.42%)                    | 0.003                   |
| Angiotensin converting enzyme inhibitors or<br>angiotensin receptor blockers, N(%) | 330 (71.74%)                    | 295 (71.08%)                    | 0.8                     |
| Calcium channel blockers, N(%)                                                     | 238 (51.74%)                    | 232 (55.90%)                    | 0.2                     |
| Diuretics, N(%)                                                                    | 320 (69.57%)                    | 298 (71.81%)                    | 0.5                     |
| Number of anti-hypertensive med classes, N(%)                                      | 3.21±1.54                       | 3.19±1.51                       | 0.8                     |
| Left ventricular mass index, g/m <sup>2.74</sup>                                   | 57.38±14.12                     | 59.35±15.22                     | 0.1                     |
| Ejection fraction, % <sup>4</sup>                                                  | 52.65±8.72                      | 52.90±8.60                      | 0.7                     |
| Left ventricular geometry <sup>4</sup>                                             |                                 |                                 | 0.7                     |
| Normal                                                                             | 24 (9.56%)                      | 29 (10.03%)                     |                         |
| Concentric remodeling                                                              | 51 (20.32%)                     | 48 (16.61%)                     |                         |
| Eccentric hypertrophy                                                              | 55 (21.91%)                     | 62 (21.45%)                     |                         |
| Concentric hypertrophy                                                             | 121 (48.21%)                    | 150 (51.90%)                    |                         |
| Diastolic relaxation <sup>4</sup>                                                  |                                 |                                 | 0.4                     |
| Normal relaxation                                                                  | 66 (23.74%)                     | 81 (25.96%)                     |                         |
| Mildly abnormal relaxation                                                         | 186 (66.91%)                    | 193 (61.86%)                    |                         |
| Moderately & Severely abnormal relaxation                                          | 26 (9.35%)                      | 38 (12.18%)                     |                         |
| Left atrial volume (ml/m <sup>2</sup> ) <sup>4</sup>                               | 4.10±0.69                       | 4.08±0.62                       | 0.7                     |

<sup>1</sup>Participants who did not have ≥ 1 pre-ESRD and ≥ 1 post-ESRD for any echo variables are excluded.

<sup>2</sup>Participants who had ≥ 1 pre-ESRD and ≥ 1 post-ESRD for any echo variables are included.

<sup>3</sup>For continuous variables, the p values are generated using the Student's t test or the Wilcoxon rank sum test; for categorical variables, the p values are generated using the chi-squared test.

<sup>4</sup>Baseline echocardiogram was performed at Year 1. Among 465 participants who are excluded, 372 of them had a visit at year 1. Among 417 participants who are included, 408 of them had a visit at year 1.
