# Supplementary material
Source: PubMed Central journal article supplement (PMC6109597)
Supplement: NIHMS969415-supplement-2.pdf [file NIHMS969415-supplement-2.pdf]

**Table S2. Baseline characteristics of participants who underwent kidney transplant as the first modality of ESRD who were included versus excluded in the analysis**

| Variable                                                                         | Exclude<br>(n=32) <sup>1</sup> | Include<br>(n=44) <sup>2</sup> | P value <sup>3</sup> |
|----------------------------------------------------------------------------------|--------------------------------|--------------------------------|----------------------|
| Age, year                                                                        | 52.42±12.29                    | 46.90±12.33                    | 0.0574               |
| Men, N (%)                                                                       | 21 (65.63%)                    | 23 (52.27%)                    | 0.2444               |
| Race, N (%)                                                                      |                                |                                |                      |
| Non-Hispanic white                                                               | 17 (53.13%)                    | 24 (54.55%)                    | 0.1794               |
| Non-Hispanic black                                                               | 5 (15.63%)                     | 10 (22.73%)                    | .                    |
| Hispanic                                                                         | 5 (15.63%)                     | 9 (20.45%)                     | .                    |
| Other                                                                            | 5 (15.63%)                     | 1 (2.27%)                      | .                    |
| Current smoker, N (%)                                                            | 4 (12.50%)                     | 5 (11.36%)                     | 0.8797               |
| CRIC eGFR, ml/min/1.73m <sup>2</sup>                                             | 32.80±9.18                     | 30.62±7.14                     | 0.2471               |
| BMI, kg/m <sup>2</sup>                                                           | 28.37±5.46                     | 28.64±7.87                     | 0.8621               |
| Systolic blood pressure, mmHg                                                    | 132.08±24.42                   | 121.86±16.96                   | 0.0467               |
| Diastolic blood pressure, mmHg                                                   | 74.17±11.82                    | 73.86±11.16                    | 0.9098               |
| LDL, mg/dl                                                                       | 93.78±37.26                    | 94.50±35.62                    | 0.9323               |
| HDL, mg/dl                                                                       | 50.94±16.64                    | 47.14±13.41                    | 0.2741               |
| Triglycerides, mg/dl                                                             | 109.00 (79.50-177.00)          | 123.50 (82.50-195.50)          | 0.6187               |
| Total cholesterol, mg/dl                                                         | 181.53±56.11                   | 178.75±41.06                   | 0.8035               |
| Hemoglobin, g/dl                                                                 | 12.03±1.31                     | 12.00±1.52                     | 0.9386               |
| HbA1c hemoglobin, %                                                              | 6.17±1.17                      | 6.27±1.26                      | 0.7301               |
| Serum albumin, g/dl                                                              | 3.80±0.45                      | 3.86±0.47                      | 0.6074               |
| Hypertension, N (%)                                                              | 28 (87.50%)                    | 34 (77.27%)                    | 0.2561               |
| Cardiovascular disease, N (%)                                                    | 7 (21.88%)                     | 7 (15.91%)                     | 0.5077               |
| Chronic obstructive pulmonary disease, N (%)                                     | 0 (00.00%)                     | 0 (00.00%)                     | .                    |
| Diabetes, N (%)                                                                  | 12 (37.50%)                    | 18 (40.91%)                    | 0.7640               |
| β-blockers, N (%)                                                                | 17 (53.13%)                    | 12 (27.27%)                    | 0.0220               |
| Angiotensin converting enzyme inhibitors or angiotensin receptor blockers, N (%) | 24 (75.00%)                    | 35 (79.55%)                    | 0.6387               |
| Calcium channel blockers, N (%)                                                  | 9 (28.13%)                     | 13 (29.55%)                    | 0.8928               |
| Diuretics, N (%)                                                                 | 15 (46.88%)                    | 22 (50.00%)                    | 0.7878               |
