# Supplementary material
Source: PubMed Central journal article supplement (PMC6109597)
Supplement: NIHMS969415-supplement-4.pdf [file NIHMS969415-supplement-4.pdf]

**Table S4. Associations of echocardiographic measures at end-stage-renal-disease (ESRD) and risk of subsequent all-cause mortality for participants who initiated dialysis**

| <i>Variable at ESRD</i>                                                             | <i>Unadjusted<br/>HR (95% CI)</i> | <i>Adjusted<sup>1</sup><br/>HR (95% CI)</i> |
|-------------------------------------------------------------------------------------|-----------------------------------|---------------------------------------------|
| Left ventricular mass index, per 1g/m <sup>2.7</sup> higher                         | <b>1.02 (1.01, 1.04)</b>          | <b>1.02 (1.004, 1.044)</b>                  |
| Ejection fraction, per 1% lower                                                     | <b>1.04 (1.02, 1.06)</b>          | <b>1.04 (1.02, 1.07)</b>                    |
| Left ventricular geometry                                                           |                                   |                                             |
| Normal                                                                              | (ref)                             | (ref)                                       |
| <b>Concentric remodeling</b>                                                        | <b>4.72 (1.05, 21.30)</b>         | 2.25 (0.47, 10.81)                          |
| Eccentric hypertrophy                                                               | 3.23 (0.73, 14.22)                | 2.26 (0.49, 10.34)                          |
| Concentric hypertrophy                                                              | 3.95 (0.95, 16.3)                 | 1.79 (0.41, 7.90)                           |
| Diastolic relaxation                                                                |                                   |                                             |
| Normal relaxation (ref)                                                             |                                   |                                             |
| Mildly abnormal relaxation                                                          | 0.86 (0.50, 1.47)                 | 0.77 (0.42, 1.422)                          |
| Moderately & Severely abnormal relaxation                                           | 2.09 (0.83, 5.25)                 | 1.74 (0.60, 5.01)                           |
| <b>Left atrial volume, per 1 ml/m<sup>2</sup> increase</b>                          | <b>1.48 (1.07, 2.06)</b>          | <b>1.53 (1.03, 2.28)</b>                    |
| Left ventricular end-systolic volume adjusted by height, per 1 ml/m <sup>2.7</sup>  | <b>1.04 (1.02, 1.06)</b>          | <b>1.04 (1.02, 1.06)</b>                    |
| Left ventricular end-diastolic volume adjusted by height, per 1 ml/m <sup>2.7</sup> | <b>1.03 (1.01, 1.05)</b>          | <b>1.03 (1.01, 1.05)</b>                    |

**Bold=p<0.05**

<sup>1</sup>Model is adjusted for age, sex, race, dialysis modality, cardiovascular disease, systolic blood pressure, number of anti-hypertensive med classes, diabetes, current smoker, and BMI from the closest visit to the echocardiographic measures at ESRD.
