# Supplementary material
Source: PubMed Central journal article supplement (PMC6109597)
Supplement: NIHMS969415-supplement-5.pdf [file NIHMS969415-supplement-5.pdf]

**Table S5. Characteristics at chronic kidney disease (CKD) and end-stage-renal-disease (ESRD) for participants who had a kidney transplant as the first modality of ESRD (N=44)**

| <i>Variable</i>                                         | <i>CKD<sup>1</sup></i> | <i>ESRD<sup>1</sup></i> | <i>P value<sup>2</sup></i> |
|---------------------------------------------------------|------------------------|-------------------------|----------------------------|
| Age, year, mean±SD                                      | 48.51±12.62            | 51.49±12.46             | <.0001                     |
| Male, N(%)                                              | 23 (52.27%)            |                         | .                          |
|                                                         | 21 (47.73%)            |                         | .                          |
| Race, N(%)                                              |                        |                         |                            |
| Non-Hispanic white                                      | 24 (54.55%)            |                         | .                          |
| Non-Hispanic black                                      | 10 (22.73%)            |                         | .                          |
| Hispanic                                                | 9 (20.45%)             |                         | .                          |
| Other                                                   | 1 (2.27%)              |                         | .                          |
| Current smoker, N(%)                                    | 5 (11.36%)             | 2 (4.55%)               | 0.08                       |
| eGFR, ml/min/1.73m <sup>2</sup> , mean±SD               | 23.49±6.88             |                         | .                          |
| BMI, kg/m <sup>2</sup> , mean±SD                        | 28.84±7.64             | 28.76±6.68              | 0.8                        |
| Systolic blood pressure, mmHg, mean±SD                  | 128.15±17.14           | 119.44±18.30            | 0.02                       |
| Diastolic blood pressure, mmHg, mean±SD                 | 75.83±9.92             | 70.94±10.12             | 0.02                       |
| LDL, mg/dl, mean±SD                                     | 94.68±33.37            | 87.59±44.42             | 0.8                        |
| HDL, mg/dl, mean±SD                                     | 48.02±14.77            | 55.41±14.03             | 0.2                        |
| Triglycerides, mg/dl, mean±SD                           | 139.00 (104.00-201.00) | 88.00 (78.00-166.00)    | 0.3                        |
| Total cholesterol, mg/dl, mean±SD                       | 181.83±40.01           | 171.71±48.78            | 0.8                        |
| CBC hemoglobin, g/dl, mean±SD                           | 11.99±1.54             | 12.24±1.34              | 0.2                        |
| HbA1c hemoglobin, %, mean±SD                            | 7.29±1.57              | 6.58±1.39               | 1.0                        |
| Serum albumin, g/dl, mean±SD                            | 3.94±0.45              | 3.98±0.35               | 0.7                        |
| Hypertension, N(%)                                      | 36 (81.82%)            | 44 (100.00%)            | .                          |
| Cardiovascular disease, N(%)                            | 9 (20.45%)             | 14 (31.82%)             | 0.03                       |
| Chronic obstructive pulmonary disease, N(%)             | 1 (2.27%)              | 4 (9.30%)               | 0.08                       |
| Diabetes, N(%)                                          | 18 (40.91%)            | 21 (47.73%)             | 0.08                       |
| β-blockers, N(%)                                        | 10 (22.73%)            | 22 (50.00%)             | 0.005                      |
| ACE inhibitors or ARBs, N(%)                            | 34 (77.27%)            | 14 (31.82%)             | <.001                      |
| Calcium channel blockers, N(%)                          | 16 (36.36%)            | 19 (43.18%)             | 0.4                        |
| Diuretics, N(%)                                         | 24 (54.55%)            | 6 (13.64%)              | <.001                      |
| Number of anti-hypertensive medication classes, mean±SD | 2.23±1.36              | 1.75±1.24               | 0.006                      |

<sup>1</sup>For categorical variables, n (%) is reported. For continuous variables, mean±sd is reported if normally distributed, and median (q1-q3) is reported if non-normally distributed.

<sup>2</sup>To compare characteristics between CKD and ESRD, the P values are generated using the McNemar's test for binary variables, and the paired t test or the Wilcoxon signed rank sum test for continuous variables.
