# Supplementary material
Source: PubMed Central journal article supplement (PMC6109597)
Supplement: NIHMS969415-supplement-6.pdf [file NIHMS969415-supplement-6.pdf]

**Table S6. Echocardiographic measures at chronic kidney disease (CKD) and end-stage-renal-disease (ESRD) for participants who had a kidney transplant as the first modality of ESRD (N=44)**

| Variable                                                                      | CKD                                            |                         | ESRD                    |                         | P value <sup>1</sup> |
|-------------------------------------------------------------------------------|------------------------------------------------|-------------------------|-------------------------|-------------------------|----------------------|
|                                                                               | <i>N pairs of measurements within a person</i> | <i>mean±sd or n (%)</i> | <i>mean±sd or n (%)</i> | <i>mean±sd or n (%)</i> |                      |
| Left ventricular mass index, g/m <sup>2.7</sup>                               | 37                                             | 45.73±13.08             | 43.35±10.33             |                         | 0.1                  |
| Ejection fraction, %                                                          | 40                                             | 53.97±6.78              | 52.03±6.76              |                         | 0.2                  |
| Left ventricular geometry                                                     |                                                |                         |                         |                         |                      |
| Normal                                                                        | 36                                             | 13 (36.11%)             | 14 (38.89%)             |                         | 0.5                  |
| Concentric remodeling                                                         | .                                              | 16 (44.44%)             | 15 (41.67%)             |                         | .                    |
| Eccentric hypertrophy                                                         | .                                              | 2 (5.56%)               | 3 (8.33%)               |                         | .                    |
| Concentric hypertrophy                                                        | .                                              | 5 (13.89%)              | 4 (11.11%)              |                         | .                    |
| Diastolic relaxation                                                          |                                                |                         |                         |                         |                      |
| Normal relaxation                                                             | 32                                             | 14 (43.75%)             | 10 (31.25%)             |                         | 0.4                  |
| Mildly abnormal relaxation                                                    | .                                              | 15 (46.88%)             | 17 (53.13%)             |                         | .                    |
| Moderately & Severely abnormal relaxation                                     | .                                              | 3 (9.38%)               | 5 (15.63%)              |                         | .                    |
| Left atrial volume, ml/m <sup>2</sup>                                         | 36                                             | 3.65±0.60               | 3.59±0.73               |                         | 0.5                  |
| Left ventricular end-systolic volume adjusted by height, ml/m <sup>2.7</sup>  | 40                                             | 15.73±4.68              | 15.69±4.16              |                         | 0.9                  |
| Left ventricular end-diastolic volume adjusted by height, ml/m <sup>2.7</sup> | 41                                             | 33.86±6.89              | 32.50±6.29              |                         | 0.1                  |

<sup>1</sup>To compare echocardiographic measures between CKD and ESRD, the P values are generated using the paired t test for continuous variables and the Bowker's test of symmetry for more than two levels of categorical variables.
